# Supplementary material for: Anaplasma phagocytophilum Activates NF-κB Signaling via Redundant Pathways
Source: Front Public Health. 2020 Oct 30;8:558283. doi: 10.3389/fpubh.2020.558283 (PMC7661751; doi:10.3389/fpubh.2020.558283)
Supplement: Supplementary file 3 [file Table_2.XLSX]

## Sheet: Sheet1
Supplemental Table 2. Genes targeted for silencing in the SureSilencing™ siRNA Array kit.
Symbol	Gene Name	Unigene	GeneBank	Description	silenced	Product Name	Catalog #	Forward primer	Forward primer sequence	Reverse primer	Reverse primer sequence
AKT1	AKT/PKB	Hs.525622	NM_005163	V-akt murine thymoma viral oncogene homolog 1		RT² qPCR Primer Assay for Human AKT1	PPH00088A	AKT1_F	ATGAGCGACGTGGCTATTGT	AKT1_R	TGAAGGTGCCATCATTCTTG
BCL10	CARMEN/CIPER	Hs.193516	NM_003921	B-cell CLL/lymphoma 10		RT² qPCR Primer Assay for Human BCL10	PPH00890E	BCL10_F	CGAGGAGGACCTCACTGAA	BCL10_R	TTGCACGTAGATGATCAAAATGT
NFKB1	DKFZp686C01211/EBP-1	Hs.654408	NM_003998	Nuclear factor of kappa light polypeptide gene enhancer in B-cells 1	x	RT² qPCR Primer Assay for Human NFKB1	PPH00204E	NFKB1_F	ATGTATGTGAAGGCCCATCC	NFKB1_R	TTGCTGGTCCCACATAGTTG
CD40	Bp50/CDW40	Hs.472860	NM_001250	CD40 molecule, TNF receptor superfamily member 5	x	RT² qPCR Primer Assay for Human CD40	PPH00296B	CD40_F	CTGGTCTCACCTCGCTATGG	CD40_R	GCAGTGGGTGGTTCTGGAT
CHUK	IKBKA/IKK-alpha	Hs.198998	NM_001278	Conserved helix-loop-helix ubiquitous kinase		RT² qPCR Primer Assay for Human CHUK	PPH00649B	CHUK_F	GCAGAGAGGAGGACCTGTTG	CHUK_R	TGCAGAAGTCATATTTAGGATGTG
ELK1	Elk1	Hs.181128	NM_005229	ELK1, member of ETS oncogene family	x	RT² qPCR Primer Assay for Human ELK1	PPH00140B	ELK1_F	CCGGAGCTGCCAACATT	ELK1_R	GAAACTGCCACAGCGTCAC
FADD	GIG3/MORT1	Hs.86131	NM_003824	Fas (TNFRSF6)-associated via death domain		RT² qPCR Primer Assay for Human FADD	PPH00367A	FADD_F	GAGCTGCTCGCCTCCCT	FADD_R	TCTCCAATCTTTCCCCACAT
IKBKB	IKK-beta/IKK2	Hs.597664	NM_001556	Inhibitor of kappa light polypeptide gene enhancer in B-cells, kinase beta		RT² qPCR Primer Assay for Human IKBKB	PPH00780B	IKBKB_F	AAATGAAAGAGCGCCTTGG	IKBKB_R	CACTGCTTGATGGCAATCTG
IKBKE	IKK-i/IKKE	Hs.321045	NM_014002	Inhibitor of kappa light polypeptide gene enhancer in B-cells, kinase epsilon		RT² qPCR Primer Assay for Human IKBKE	PPH01805B	IKBKE_F	ATGCAGACGGACTCTGGAAG	IKBKE_R	AGTTCCTGGATCTCAGGCGT
IKBKG	AMCBX1/FIP-3	Hs.43505	NM_003639	Inhibitor of kappa light polypeptide gene enhancer in B-cells, kinase gamma		RT² qPCR Primer Assay for Human IKBKG	PPH00660A	IKBKG_F	CTGCCTGGAGGAGAATCAAG	IKBKG_R	CTGGCTTGGAAATGCAGAAG
IL1R1	CD121A/D2S1473	Hs.701982	NM_000877	Interleukin 1 receptor, type I		RT² qPCR Primer Assay for Human IL1R1	PPH00274A	IL1R1_F	TGATTTCTTCTCTGGAGGCTG	IL1R1_R	TTGGGTTAAGAGGACAGGGA
IRAK1	IRAK/pelle	Hs.522819	NM_001569	Interleukin-1 receptor-associated kinase 1	x	RT² qPCR Primer Assay for Human IRAK1	PPH00835A	IRAK1_F	GAGACCTTGGCTGGTCAGAG	IRAK1_R	CTTCTCAAAGCCACTCCAGC
IRAK2	IRAK-2	Hs.449207	NM_001570	Interleukin-1 receptor-associated kinase 2		RT² qPCR Primer Assay for Human IRAK2	PPH01800B	IRAK2_F	GCAACTTGTGGACCTCCTGT	IRAK2_R	TGGAATGGGACACCTGATTT
LTBR	CD18/D12S370	Hs.1116	NM_002342	Lymphotoxin beta receptor (TNFR superfamily, member 3)		RT² qPCR Primer Assay for Human LTBR	PPH00816B	LTBR_F	CCGACACAACCTGCAAAAAT	LTBR_R	GAGCAGAAAGAAGGCCAGTG
MALT1	DKFZp434L132/MLT	Hs.601217	NM_173844	Mucosa associated lymphoid tissue lymphoma translocation gene 1		RT² qPCR Primer Assay for Human MALT1	PPH13758A	MALT1_F	TTTCCTGCAGGCTATGGAAC	MALT1_R	GCCAAGACTGCCTTTGACTC
MAP3K1	MAPKKK1/MEKK	Hs.657756	NM_005921	Mitogen-activated protein kinase kinase kinase 1	x	RT² qPCR Primer Assay for Human MAP3K1	PPH00706B	MAP3K1_F	CACTGTGGTCCTGAATGTGG	MAP3K1_R	GTAGAGACGGGGTTTCACCA
NFKBIB	IKBB/TRIP9	Hs.9731	NM_002503	Nuclear factor of kappa light polypeptide gene enhancer in B-cells inhibitor, beta	x	RT² qPCR Primer Assay for Human NFKBIB	PPH01811B	NFKBIB_F	GTCACTGAGGATGGGGACAC	NFKBIB_R	ATGTCTCCCCCAGGATGG
MAP3K3	MAPKKK3/MEKK3	Hs.29282	NM_002401	Mitogen-activated protein kinase kinase kinase 3		RT² qPCR Primer Assay for Human MAP3K3	PPH00722A	MAP3K3_F	CAGTCCGCAGGGGATATAAA	MAP3K3_R	ATAGCCAGGGGGAGGTGA
MAP3K7	TAK1/TGF1a	Hs.644143	NM_003188	Mitogen-activated protein kinase kinase kinase 7	x	RT² qPCR Primer Assay for Human MAP3K7	PPH00749B	MAP3K7_F	CCTTCCCAGGTCCTCAACTT	MAP3K7_R	TGCAAACAACTCCAAAGGCT
MYD88	MYD88D	Hs.82116	NM_002468	Myeloid differentiation primary response gene (88)		RT² qPCR Primer Assay for Human MYD88	PPH00911A	MYD88_F	GACTGCTCGAGCTGCTTACC	MYD88_R	TCCTGCTGCTGCTTCAAGAT
NFKBIA	IKBA/MAD-3	Hs.81328	NM_020529	Nuclear factor of kappa light polypeptide gene enhancer in B-cells inhibitor, alpha		RT² qPCR Primer Assay for Human NFKBIA	PPH00170E	NFKBIA_F	CAGCAGCTCACCGAGGAC	NFKBIA_R	AAAGCCAGGTCTCCCTTCAC
PIK3CG	PI3CG/PI3K	Hs.32942	NM_002649	Phosphoinositide-3-kinase, catalytic, gamma polypeptide		RT² qPCR Primer Assay for Human PIK3CG	PPH02226A	PIK3CG_F	GAAGACAAGCCCACACTTCC	PIK3CG_R	CAGCATCATGGAGAACAGGA
PRKCQ	PRKCT/nPKC-theta	Hs.498570	NM_006257	Protein kinase C, theta		RT² qPCR Primer Assay for Human PRKCQ	PPH01637E	PRKCQ_F	CGTTTCTGACGCACATGTTT	PRKCQ_R	CTTGTGGCAGCTTTGGATGT
EGFR	ERBB/ERBB1	Hs.488293	NM_005228	Epidermal growth factor receptor (erythroblastic leukemia viral (v-erb-b) oncogene homolog, avian)		RT² qPCR Primer Assay for Human EGFR	PPH00138B	EGFR_F	GGGCTCTGGAGGAAAAGAAA	EGFR_R	TCCTCTGGAGGCTGAGAAAA
RELA	NFKB3/p65	Hs.502875	NM_021975	V-rel reticuloendotheliosis viral oncogene homolog A (avian)		RT² qPCR Primer Assay for Human RELA	PPH01812B	RELA_F	GAATTCCAGTACCTGCCAGA	RELA_R	GGTCCGCTGAAAGGACTCTT
RELB	I-REL/IREL	Hs.654402	NM_006509	V-rel reticuloendotheliosis viral oncogene homolog B		RT² qPCR Primer Assay for Human RELB	PPH00287A	RELB_F	AGCATCCTTGGGGAGAGC	RELB_R	AGGCAGTCACCTCCACCTC
RIPK1	RIP/RIP1	Hs.519842	NM_003804	Receptor (TNFRSF)-interacting serine-threonine kinase 1		RT² qPCR Primer Assay for Human RIPK1	PPH00335B	RIPK1_F	GGCATTGAAGAAAAATTTAGGC	RIPK1_R	TCACAACTGCATTTTCGTTTG
TICAM1	PRVTIRB/TICAM-1	Hs.29344	NM_182919	Toll-like receptor adaptor molecule 1		RT² qPCR Primer Assay for Human TICAM1	PPH06044A	TICAM1_F	CCCCTTTTTGACACAAGGAA	TICAM1_R	TGTTTCTCAGGCCCCATAAC
TICAM2	TICAM-2/TIRAP3	Hs.710895	NM_021649	Toll-like receptor adaptor molecule 2	x	RT² qPCR Primer Assay for Human TICAM2	PPH06042A	TICAM2_F	TTAAGAGAAGCTCAAGGCCG	TICAM2_R	TCCAAGGCAGAAGAGGAAAA
TLR1	CD281/DKFZp547I0610	Hs.654532	NM_003263	Toll-like receptor 1		RT² qPCR Primer Assay for Human TLR1	PPH01799A	TLR1_F	CAGCTCTTCTGTTTTTGTGGC	TLR1_R	GTGCCCAATATGCCTTTGTT
TLR2	CD282/TIL4	Hs.519033	NM_003264	Toll-like receptor 2		RT² qPCR Primer Assay for Human TLR2	PPH01808A	TLR2_F	AACCGGAGAGACTTTGCTCA	TLR2_R	CCACTGACAAGTTTCAGGCA
TLR3	CD283	Hs.657724	NM_003265	Toll-like receptor 3	x	RT² qPCR Primer Assay for Human TLR3	PPH01803E	TLR3_F	AGGAAAGGCTAGCAGTCATCC	TLR3_R	ATGCACACAGCATCCCAAAG
TLR4	ARMD10/CD284	Hs.174312	NM_138554	Toll-like receptor 4		RT² qPCR Primer Assay for Human TLR4	PPH01795E	TLR4_F	GGACTCTGATCCCAGCCAT	TLR4_R	TGCCCCATCTTCAATTGTCT
IGF1R	CD221/IGFIR	Hs.643120	NM_000875	Insulin-like growth factor 1 receptor		RT² qPCR Primer Assay for Human IGF1R	PPH00350E	IGF1R_F	GTACAACTACCGCTGCTGGA	IGF1R_R	TGGCAGCACTCATTGTTCTC
NFKB2	LYT-10/LYT10	Hs.73090	NM_002502	Nuclear factor of kappa light polypeptide gene enhancer in B-cells 2 (p49/p100)		RT² qPCR Primer Assay for Human NFKB2	PPH00782E	NFKB2_F	CACATGGGTGGAGGCTCT	NFKB2_R	GGACTGGTAGGGGCTGTAGG
TNFRSF10A	APO2/CD261	Hs.591834	NM_003844	Tumor necrosis factor receptor superfamily, member 10a	x	RT² qPCR Primer Assay for Human TNFRSF10A	PPH00842A	TNFRSF10A_F	GACCTTCAAGTTTGTCGTCG	TNFRSF10A_R	GGCTATGTTCCCATTGCTGT
TNFRSF10B	CD262/DR5	Hs.521456	NM_003842	Tumor necrosis factor receptor superfamily, member 10b	x	RT² qPCR Primer Assay for Human TNFRSF10B	PPH00241B	TNFRSF10B_F	AAGACCCTTGTGCTCGTTGT	TNFRSF10B_R	CTCTCTGCTGGGGAGCTAGG
TNFRSF1A	CD120a/FPF	Hs.279594	NM_001065	Tumor necrosis factor receptor superfamily, member 1A	x	RT² qPCR Primer Assay for Human TNFRSF1A	PPH00346B	TNFRSF1A_F	GGAGTGAGAGGCCATAGCTG	TNFRSF1A_R	ATATTCCCACCAACAGCTCC
TRADD	Hs.89862	Hs.460996	NM_003789	TNFRSF1A-associated via death domain	x	RT² qPCR Primer Assay for Human TRADD	PPH00392E	TRADD_F	TGCCCAGACTTTTCTGTTCC	TRADD_R	GCCATTTGAGACCCACAGAG
TRAF2	MGC:45012/TRAP	Hs.522506	NM_021138	TNF receptor-associated factor 2	x	RT² qPCR Primer Assay for Human TRAF2	PPH00352B	TRAF2_F	CCCTTAACTTGTGACGGCTG	TRAF2_R	ATCTGCAAGGGACTCGACAC
TRAF3	CAP-1/CD40bp	Hs.510528	NM_003300	TNF receptor-associated factor 3	x	RT² qPCR Primer Assay for Human TRAF3	PPH00338A	TRAF3_F	AGCAGAACGCTGCGGAC	TRAF3_R	TCGACTCCATTTTAGGAAAGAG
TRAF6	MGC:3310/RNF85	Hs.591983	NM_004620	TNF receptor-associated factor 6	x	RT² qPCR Primer Assay for Human TRAF6	PPH00329A	TRAF6_F	TCCCCGCGCACTAGAAC	TRAF6_R	GCCACACAGCAGTCACTTTC
NEG	NEG	N/A	SA_00112	Negative Control siRNA Wells for siRNA array
NEG	NEG	N/A	SA_00112	Negative Control siRNA Wells for siRNA array
NOR	NOR	N/A	SA_00113	No siRNA Control Wells, Mock Transfection Control Wells
NOR	NOR	N/A	SA_00113	No siRNA Control Wells, Mock Transfection Control Wells
TEC	TEC	N/A	SA_00114	Transfection Efficiency Control Wells
NOC	NOC	N/A	SA_00115	No Cells, No siRNA Control Wells
NEG	NEG	N/A	SA_00112	Negative Control siRNA Wells for siRNA array
NEG	NEG	N/A	SA_00112	Negative Control siRNA Wells for siRNA array
NOR	NOR	N/A	SA_00113	No siRNA Control Wells, Mock Transfection Control Wells
NOR	NOR	N/A	SA_00113	No siRNA Control Wells, Mock Transfection Control Wells
TEC	TEC	N/A	SA_00114	Transfection Efficiency Control Wells
NOC	NOC	N/A	SA_00115	No Cells, No siRNA Control Wells
